# Supplementary material
Source: publisher figshare collection journal article supplement (https://acs.figshare.com/ndownloader/files/4037086)
Supplement: Supplementary file 1 [file 4037086]

# Supporting Information For: High Performance Perovskite-Polymer Hybrid Solar Cells via Electronic Coupling with Fullerene Monolayers

*Agnese Abrusci<sup>1</sup>, Samuel D. Stranks<sup>1</sup>, Pablo Docampo<sup>1</sup>, Hin-Lap Yip<sup>2</sup>, Alex K.-Y. Jen<sup>2</sup> and  
Henry J. Snaith<sup>1</sup>*

<sup>1</sup>Clarendon Laboratory, Parks Road, Oxford, OX1 3PU, United Kingdom, <sup>2</sup>Department of  
Materials Science & Engineering, Seattle, WA 98195, United States

## **1. Materials and Methods**

### **i. Solar Cell Assembly and Characterization**

Fluorine doped tin oxide (FTO) coated glass sheets (7  $\Omega/\square$  Pilkington) were etched with zinc powder and HCl (2 M) to obtain the required electrode pattern. The sheets were then washed with soap (2% Hellmanex in water), de-ionized water, acetone, methanol and finally treated under oxygen plasma for 10 minutes to remove the last traces of organic residues. The compact layer solution was prepared by adding 369  $\mu\text{L}$  of Titanium isopropoxide (99.99% Sigma-Aldrich) into 2.53 mL of ethanol. Separately, 35  $\mu\text{L}$  of a 2M HCl solution were added into 2.53 mL of ethanol. The second solution was then added dropwise to the first one under stirring, and the mixture filtered with a PFTE hydrophobic 0.45  $\mu\text{m}$  filter. The FTO sheets were subsequently

coated with a compact layer of  $\text{TiO}_2$  (100 nm) by spincoating this mixture at 2000 rpm for 45 sec.

The standard Dyesol  $\text{TiO}_2$  paste 18NR-T (~20 nm in diameter, 60 % porosity) was previously diluted down in a 1:1 paste:terpineol weight ratio, shaken overnight and ultrasonicated. The paste was then screen-printed to get a  $\text{TiO}_2$  average thickness of 600 nm. The sheets were slowly heated to 500 °C (ramped over 1 ½ hours) and baked at this temperature for 30 minutes in air. After cooling, slides were cut down to size.

The  $\text{C}_{60}$ -substituted benzoic acid self-assembled monolayer ( $\text{C}_{60}\text{SAM}$ ) material was synthesized as described elsewhere<sup>1, 2</sup>. The soaking solution was prepared by dissolving  $\text{C}_{60}\text{SAM}$  (0.1mM) in a 1:1 volume ratio of THF:ethanol and passing the solution through a 0.2µm PTFE filter. The functionalization was achieved by immersing the  $\text{TiO}_2$  substrates in the  $\text{C}_{60}\text{SAM}$  solution for 24 hrs, followed by rinsing with a THF:ethanol (1:1 by volume) mixture and drying for 10 min at 100 °C.

The perovskite precursor solution was synthesized and dissolved at 40 wt% in dimethylformamide (DMF) as described previously<sup>3</sup>. The solution was spun-cast at 2000 rpm for 45 sec in air, and the substrates were subsequently heated at 100 °C for 45 min in air to allow perovskite crystal formation. The polymeric hole transporters P3HT (Rieke Metals) or PCPDTBT (One-Material) were dissolved at 1.5 wt% in chlorobenzene and spun-cast at 2000 rpm for 45 sec. Spiro-OMeTAD was dissolved at 7 wt% in chlorobenzene with tert-butylpyridine (tBP, 55 mM) and lithium bis(trifluoromethanesulfonyl)imide (Li-TFSI, 9mM) additives and spun-cast at 1000 rpm. Finally, the films were placed in a thermal evaporator where 150 nm thick silver electrodes were deposited through a shadow mask under high vacuum ( $10^{-6}$  mbar).

Current-voltage (J-V) characteristics were measured with a Keithley 2400 SourceMeter under AM 1.5 simulated sunlight (ABET Technologies Sun 2000 Solar Simulator) at an irradiance of  $100 \text{ mW}\cdot\text{cm}^{-2}$  with the intensity set using an NREC-calibrated KG5-filtered Si reference cell. External quantum efficiency (EQE) measurements were acquired by applying chopped monochromatic light while biasing with white light-emitting diodes at an equivalent solar irradiance of  $10 \text{ mW}\cdot\text{cm}^{-2}$ . The active areas of the devices were defined by metal optical masks with a square aperture of 3 mm, giving an area of  $0.09 \text{ cm}^2$ .

## ii. **Optical Spectroscopy**

Spectroscopic measurements were carried out on samples identical to the photovoltaic devices but prepared on glass without FTO or metal electrodes. Steady-state absorption data were acquired using a Perkin-Elmer Lambda 1050 UV/Vis/NIR Spectrometer. Films for cw-photoinduced absorption (PIA) were placed under vacuum ( $<10^{-5}$  mbar) and excited with an Ar-ion laser tuned to 496.5 nm (maximal intensity of  $50 \text{ mW}/\text{cm}^2$ ) and chopped at 23 Hz. A continuous white light probe produced by a halogen bulb ( $\sim 1$  sun intensity) was passed through the sample and detected using a monochromator (Spectra Pro 2300i, Acton Research Corp.) coupled to diodes for detection in the visible (PDA10A, Thorlabs) and in the NIR (ID-441-C, Acton Research Corp.). Data were acquired using a lock-in amplifier (SR830, Stanford Research Systems) locked to the light modulation frequency and a NI USB-6008 (National Instruments) acquisition card. A customized Labview (National Instruments) program provided an automated interface to control hardware and record spectra.

Steady-state photoluminescence (PL) measurements were taken using an automated spectrofluorometer (Fluorolog, Horiba Jobin-Yvon), with a 450 W xenon lamp excitation source

and a photomultiplier tube (PMT) detector. All spectra were corrected for instrumental response using a calibration lamp of known emissivity.

Time-resolved PL measurements were acquired using a time-correlated single photon counting (TCSPC) setup (FluoTime 300, PicoQuant GmbH). Film samples were photoexcited using a 507nm laser head (LDH-P-C-510, PicoQuant GmbH) pulsed at 25MHz, with a pulse duration of 117ps and fluence of  $\sim 0.1 \mu\text{J}/\text{cm}^2$ . The PL was collected using a high resolution monochromator and hybrid photomultiplier detector assembly (PMA Hybrid 40, PicoQuant GmbH).

### **iii. Transient Photocurrent and Photovoltage Decay Technique**

The photovoltage and photocurrent decay measurements were performed using a similar method to O'Regan et al.<sup>4</sup> and Bisquert et al.<sup>5</sup>. A steady-state background white illumination from an array of diodes (Lumiled Model LXHL-NWE8 Whitestar) was first applied to the cell, generating a background charge that is proportional to the light intensity applied. A short pulse between 10-100  $\mu\text{s}$ , generated from red light diodes (LXHLND98 Redstar, 200), was then applied. This enabled the charge recombination and transport rate constants to be obtained directly from the exponential decays measured with a 1GHz Agilent oscilloscope.

Measurements were performed at fixed potential conditions, i.e. potentiostatic mode in order to extract the generated charge ( $\Delta Q$ ) by the pulse, and at fixed current conditions, i.e. galvanostatic mode in order to extract the perturbation voltage ( $\Delta V$ ). The differential capacitance as a function of voltage for the system can then be directly measured as  $C(V) = \Delta Q / \Delta V$ .

#### iv. Conduction and valence bands

The conduction and valence band values presented in Figure 1(a) were determined as follows. P3HT and C60-SAM values were taken from the literature in conjunction with known optical band gaps<sup>6, 7</sup>. As discussed in our previous work, there is some uncertainty in the C60-SAM energy levels<sup>6</sup>. The perovskite and TiO<sub>2</sub> valence bands, with respect to the Fermi levels, were computed from x-ray photo-electron spectroscopy (XPS) valence measurements, which will be presented elsewhere<sup>8</sup>. TiO<sub>2</sub> values, with respect to vacuum, were also taken from the literature<sup>6</sup> and used to shift the perovskite values to those with respect to vacuum. Conduction bands were then calculated using optical band gaps.

#### 2. Additional Data

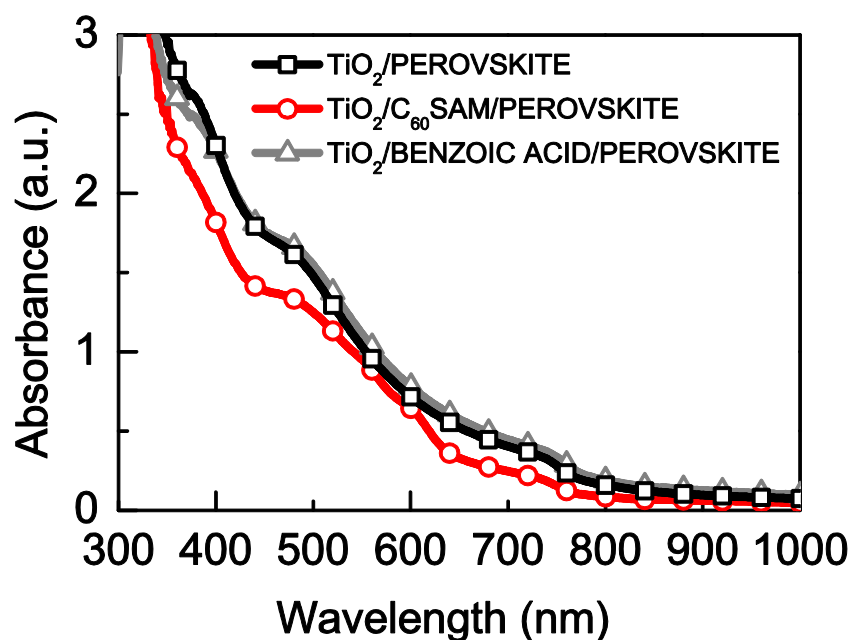

**Figure S1.** Absorption spectra of perovskite film on 600 nm thick mesoporous titania glass substrates with no interlayer, benzoic acid and C<sub>60</sub>SAM fullerene functionalization.

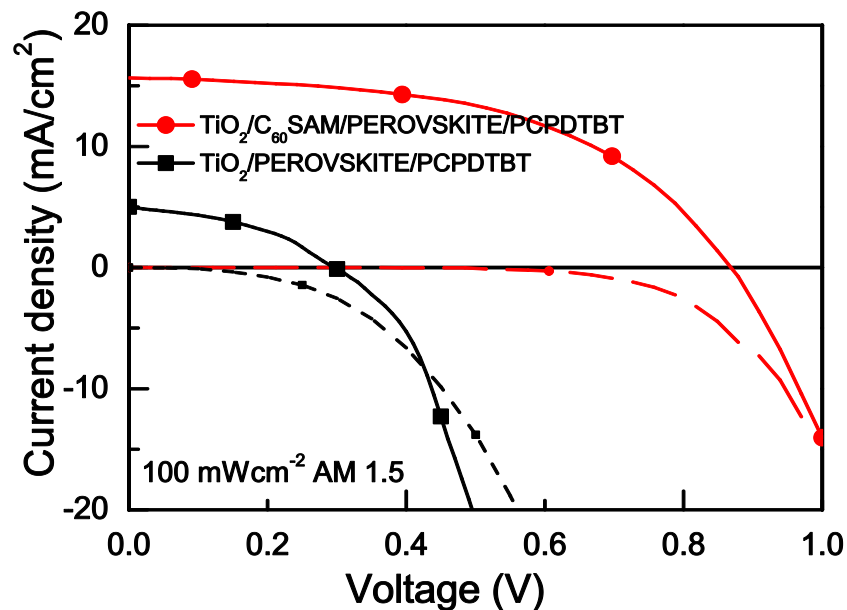

**Figure S2.** J-V characteristics taken under AM1.5 simulated sunlight ( $100 \text{ mW}\cdot\text{cm}^{-2}$  irradiance) and in the dark for devices with and without  $\text{C}_{60}\text{SAM}$  fullerene functionalization with PCPDTBT as the hole transporter. Device parameters were  $J_{\text{SC}} = 5.02 \text{ mA}\cdot\text{cm}^{-2}$ ,  $V_{\text{OC}} = 0.3 \text{ V}$ ,  $\text{FF} = 0.40$ ,  $\eta = 0.58\%$  for  $\text{TiO}_2/\text{Perovskite}/\text{PCPDTBT}$  devices, and  $J_{\text{SC}} = 15.6 \text{ mA}\cdot\text{cm}^{-2}$ ,  $V_{\text{OC}} = 0.88 \text{ V}$ ,  $\text{FF} = 0.51$ ,  $\eta = 6.84\%$  for  $\text{TiO}_2/\text{C}_{60}\text{SAM}/\text{Perovskite}/\text{PCPDTBT}$  devices.

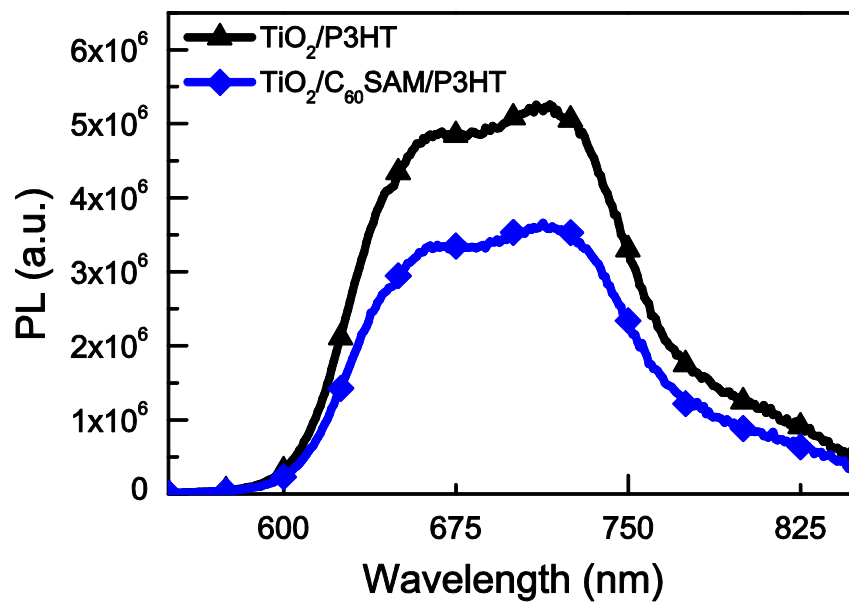

**Figure S3.** Photoluminescence spectra of P3HT films on 600 nm mesoporous titania glass substrates when photoexcited at 525nm, showing PL quenching due to C<sub>60</sub>SAM fullerene functionalization.

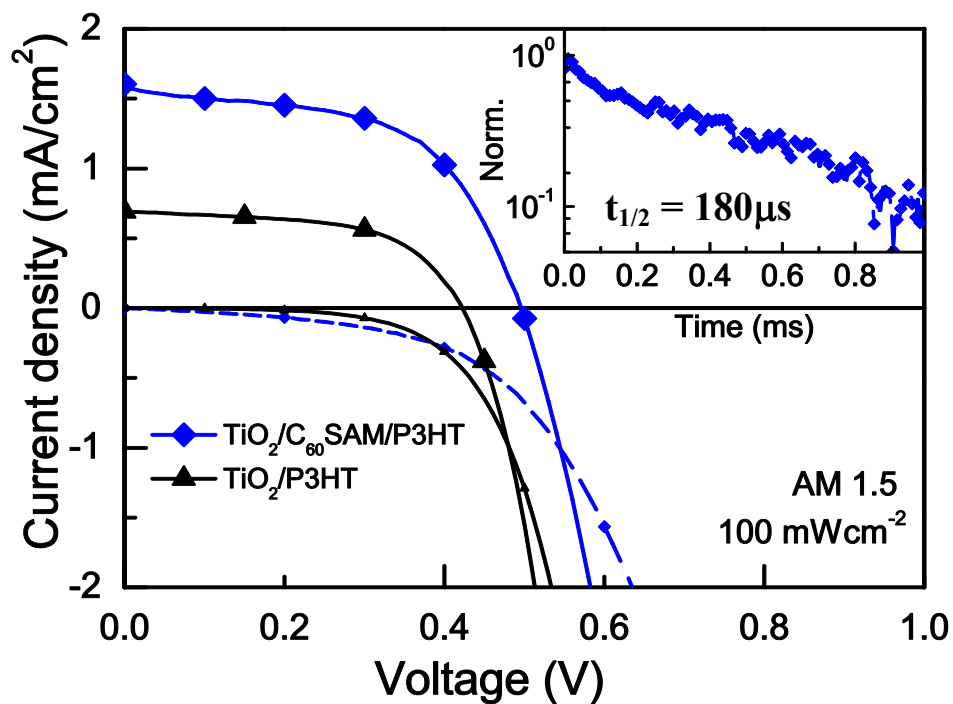

**Figure S4.** J-V characteristics taken under simulated AM1.5 100 mW·cm<sup>-2</sup> irradiance and in the dark for no-perovskite devices with and without C<sub>60</sub>SAM fullerene functionalization. Device parameters were  $J_{SC} = 0.69 \text{ mA}\cdot\text{cm}^{-2}$ ,  $V_{OC} = 0.42 \text{ V}$ ,  $FF = 0.58$ ,  $\eta = 0.17\%$  for TiO<sub>2</sub>/P3HT devices, and  $J_{SC} = 1.6 \text{ mA}\cdot\text{cm}^{-2}$ ,  $V_{OC} = 0.5 \text{ V}$ ,  $FF = 0.55$ ,  $\eta = 0.43\%$  for TiO<sub>2</sub>/C<sub>60</sub>SAM/P3HT devices. *Inset:* Transient photocurrent decay trace for a TiO<sub>2</sub>/C<sub>60</sub>SAM/P3HT device with  $t_{1/2} = 180\mu\text{s}$ , which is similar to that seen for “bare” TiO<sub>2</sub> devices<sup>9</sup>.



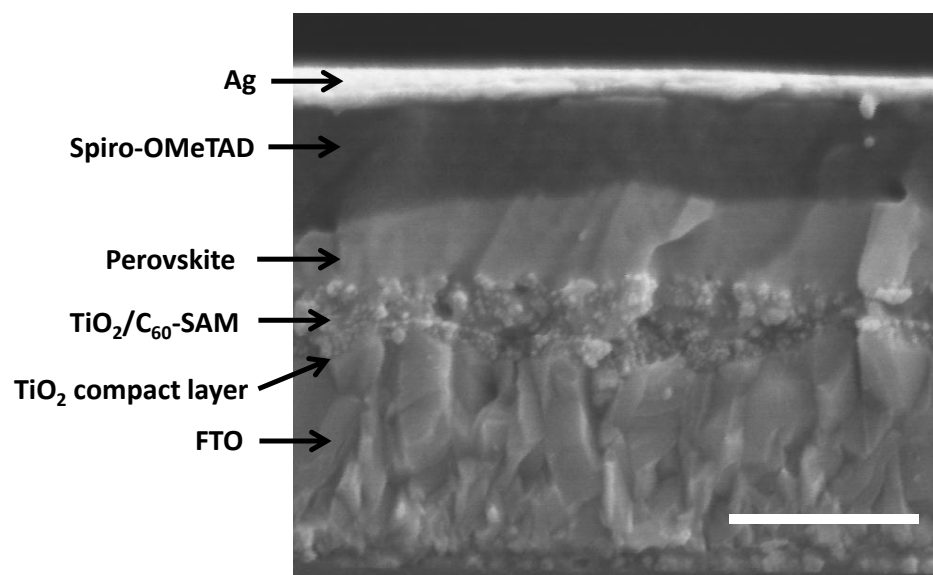

**Figure S5.** Cross-sectional scanning electron microscope (SEM) image of an optimized  $\text{TiO}_2/\text{C}_{60}$ -SAM/Perovskite/Spiro solar cell acquired using an Hitachi S-4300. The white scale bar represents 500nm. The mesoporous  $\text{TiO}_2$  layer and the perovskite capping layer are both ~200nm thick.

## References

1. Hau, S. K.; Cheng, Y.-J.; Yip, H.-L.; Zhang, Y.; Ma, H.; Jen, A. K. Y. *ACS Applied Materials & Interfaces* **2010**, 2, (7), 1892-1902.
2. Hau, S. K.; Yip, H.-L.; Acton, O.; Baek, N. S.; Ma, H.; Jen, A. K. Y. *Journal of Materials Chemistry* **2008**, 18, (42), 5113-5119.
3. Lee, M. M.; Teuscher, J.; Miyasaka, T.; Murakami, T. N.; Snaith, H. J. *Science* **2012**, 338, (6107), 643-647.
4. O'Regan, B. C.; Lenzmann, F. *The Journal of Physical Chemistry B* **2004**, 108, (14), 4342-4350.
5. Bisquert, J.; Fabregat-Santiago, F.; Mora-Seró, I.; Garcia-Belmonte, G.; Giménez, S. *The Journal of Physical Chemistry C* **2009**, 113, (40), 17278-17290.
6. Grancini, G.; Santosh Kumar, R. S.; Abrusci, A.; Yip, H.-L.; Li, C.-Z.; Jen, A.-K. Y.; Lanzani, G.; Snaith, H. J. *Advanced Functional Materials* **2012**, 22, (10), 2160-2166.
7. Chua, L. L.; Zaumseil, J.; Chang, J. F.; Ou, E. C. W.; Ho, P. K. H.; Sirringhaus, H.; Friend, R. H. *Nature* **2005**, 434, 194-199.
8. Grancini, G et al. *Manuscript in Preparation*.
9. Docampo, P.; Stefiak, M.; Guldin, S.; Gunning, R.; Yufa, N. A.; Cai, N.; Wang, P.; Steiner, U.; Wiesner, U.; Snaith, H. J. *Advanced Energy Materials* **2012**, 2, (6), 676-682.
